# Supplementary material
Source: PubMed Central journal article supplement (PMC7485037)
Supplement: Supplementary_material1.pdf [file Supplementary_material1.pdf]

## Supplemental Tables

Table 1a: Data Sources

| <b>Data source</b>                      | <b>Description</b>                                                                                                                                                                                   |
|-----------------------------------------|------------------------------------------------------------------------------------------------------------------------------------------------------------------------------------------------------|
| Canadian Community Health Survey (CCHS) | Nationally-representative survey conducted every 2 years through telephone and in-person interviews. Collects information related to health status, healthcare utilization, and health determinants. |
| Continuing Care Reporting System (CCRS) | Provides demographic and clinical information about individuals receiving facility-based continuing care services.                                                                                   |
| Discharge Abstract Database (CIHI-DAD)  | Maintained by the Canadian Institute for Health Information; captures demographic, administrative, and clinical information regarding hospital discharges in Canada.                                 |
| Homecare Database (HCD)                 | Provides information on all homecare services from the Ontario Association of Community Care Access Centres.                                                                                         |

|                                                   |                                                                                                                                                                               |
|---------------------------------------------------|-------------------------------------------------------------------------------------------------------------------------------------------------------------------------------|
| National Ambulatory Care Reporting System (NACRS) | Maintained by the Canadian Institute for Health Information; captures demographic, administrative and clinical information regarding emergency department visits in Canada.   |
| Ontario Drug Benefit (ODB)                        | Contains claims for prescription drugs received under the Ontario Drug Benefit Program (which all Ontario residents aged 65 and above are eligible for).                      |
| Ontario Health Insurance Plan (OHIP)              | Captures all claims for reimbursement by Ontario physicians for inpatient and ambulatory visits, consultations and procedures.                                                |
| Ontario Mental Health Reporting System (OMHRS)    | Provides information regarding mental health-related inpatient admissions (i.e. admission to beds in all psychiatric facilities).                                             |
| Primary Care Population (PCPOP)                   | Created by ICES, derived from other databases. Provides information regarding primary care visits and enrollment in various models of primary care (e.g. family health team). |
| Registered Persons Database (RPDB)                | Holds demographic information about all individuals with an Ontario health card number.                                                                                       |

Table 1b: Measures and Descriptions

| Variable           | Data source | Description                                                                                                                                     |
|--------------------|-------------|-------------------------------------------------------------------------------------------------------------------------------------------------|
| Age                | RPDB        | N/A                                                                                                                                             |
| Sex                | RPDB        | N/A                                                                                                                                             |
| Immigration status | CCHS        | <p>“Were you born a Canadian citizen?”</p> <p>“In what year did you first come to Canada to live?”</p>                                          |
| Level of education | CCHS        | <p>“What is the highest degree, certificate, or diploma you have obtained?”</p>                                                                 |
| Income quintiles   | RPDB        | Household income based on the 2006 Canadian census.                                                                                             |
| Marital status     | CCHS        | <p>“What is your marital status? Are you... married?</p> <p>Living common-law? Widowed? Separated?</p> <p>Divorced? Single, never married?”</p> |

|                     |      |                                                                                                                                                                                                                                                    |
|---------------------|------|----------------------------------------------------------------------------------------------------------------------------------------------------------------------------------------------------------------------------------------------------|
| Living arrangement  | CCHS | Derived variable by Statistics Canada based on questions asked in the CCHS.                                                                                                                                                                        |
| Alcohol Consumption | CCHS | <p>“During the past 12 months, how often did you drink alcoholic beverages?”</p> <p>Average daily alcohol consumption derived from the following question: Starting with yesterday, how many drinks did you have: Sunday? Monday? Tuesday? ...</p> |
| Smoking status      | CCHS | “At the present time, do you smoke cigarettes daily, occasionally, or not at all?”                                                                                                                                                                 |
| Opioid Use          | ODB  | Based on prescription claims. Chronic opioid user defined as: 120 or more cumulative calendar days of filled opioid prescriptions.                                                                                                                 |
| Food Security       | CCHS | “The food that you bought just didn’t last, and there wasn’t any money to get more. Was that often true, sometimes true, or never true in the past 12 months?”                                                                                     |

|                                           |                |                                                                                                                                                                                                            |
|-------------------------------------------|----------------|------------------------------------------------------------------------------------------------------------------------------------------------------------------------------------------------------------|
| Self-perceived general health             | CCHS           | “In general, would you say your health is: poor, fair, good, very good, excellent?”                                                                                                                        |
| Self-perceived mental health              | CCHS           | “In general, would you say your mental health is: poor, fair, good, very good, excellent?”                                                                                                                 |
| Sense of belonging to local community     | CCHS           | “How would you describe your sense of belonging to your local community?”                                                                                                                                  |
| Enrollment in a primary care model        | PCPOP          | N/A                                                                                                                                                                                                        |
| Enrollment in a family health team        | PCPOP          | Family health teams are primary healthcare organizations that include other professionals such as mental health care workers through Ontario health insurance records.                                     |
| Johns Hopkins Aggregated Diagnostic Group | OHIP, CIHI-DAD | The ACG system uses Ontario health insurance codes along with data from the Canadian Discharge Abstract Database (ICD-9 and ICD-10 codes) to categorize patients into one or more of 32 adjusted diagnosis |

|                                                  |             |                                                                                                                                                                                                |
|--------------------------------------------------|-------------|------------------------------------------------------------------------------------------------------------------------------------------------------------------------------------------------|
|                                                  |             | groups (ADGs). The ADGs are a morbidity cluster that represent the severity and persistence of a patient's condition.                                                                          |
| Continuity of care                               | OHIP, PCPOP | Percent of visits to the usual provider of care based on visits to any general practitioner, family physician or community medicine practitioner through OHIP records in the previous 2 years. |
| Visit to a psychiatrist                          | OHIP        | Based on reimbursement claims from a psychiatrist (any visit 2 years prior to and within 5 years after index interview date).                                                                  |
| Anti-depressant use                              | ODB         | Any anti-depressant use based on prescription claims.                                                                                                                                          |
| General emergency department visit               | NACRS       | Any emergency department visit within 5 years after index interview date.                                                                                                                      |
| Mental health-related emergency department visit | NACRS       | Any mental health/addiction-related emergency department visit within 5 years after index interview date.                                                                                      |

|                                       |                    |                                                                                            |
|---------------------------------------|--------------------|--------------------------------------------------------------------------------------------|
| General hospitalization               | CIHI-DAD           | Any acute, non-elective hospital admission within 5 years after index interview date.      |
| Mental health-related hospitalization | OMHRS              | Any mental health/addiction-related acute admission to hospital or mental health facility. |
| Admission to long-term care           | ODB, CCRS, or OHIP | Record of admission to long-term care in any of the ODB, CCRS, or OHIP databases.          |
| Death                                 | RPDB               | N/A                                                                                        |

Table 2a. Weighted Logistic Regression Results Quantifying Associations between Potential Risk Factors and Mood Disorder



| <b>Variable</b>           | <b>Crude OR<br/>(95% CI)</b> | <b>Model 1 OR<br/>(95% CI)</b> | <b>Model 2 OR<br/>(95% CI)</b> | <b>Model 3 OR<br/>(95% CI)</b> | <b>Model 4 OR<br/>(95% CI)</b> |
|---------------------------|------------------------------|--------------------------------|--------------------------------|--------------------------------|--------------------------------|
| <b>Age Category</b>       |                              |                                |                                |                                |                                |
| 65-74                     | 1.00                         | 1.00                           | 1.00                           | 1.00                           | 1.00                           |
| 75-84                     | 0.76 (0.64-0.89)             | 0.74 (0.63-0.88)               | 0.76 (0.64-0.90)               | 0.76 (0.64-0.91)               | 0.72 (0.60-0.85)               |
| 85 or older               | 0.60 (0.45-0.80)             | 0.57 (0.43-0.76)               | 0.59 (0.44-0.79)               | 0.57 (0.43-0.77)               | 0.53 (0.39-0.72)               |
| <b>Sex</b>                |                              |                                |                                |                                |                                |
| Male                      | 1.00                         | 1.00                           | 1.00                           | 1.00                           | 1.00                           |
| Female                    | 1.49 (1.27-1.75)             | 1.53 (1.30-1.79)               | 1.49 (1.27-1.74)               | 1.39 (1.19-1.63)               | 1.39 (1.18-1.64)               |
| <b>Immigration status</b> |                              |                                |                                |                                |                                |
| Non-immigrant             | 1.00                         | N/A                            | 1.00                           | 1.00                           | 1.00                           |
| Immigrant                 | 0.86 (0.72-1.01)             |                                | 0.83 (0.70-0.99)               | 0.85 (0.71-1.02)               | 0.86 (0.72-1.03)               |
| <b>Income Quintile</b>    |                              |                                |                                |                                |                                |
| 1                         | 1.37 (1.09-1.71)             | N/A                            | 1.26 (1.01-1.59)               | 1.07 (0.85-1.36)               | 1.09 (0.86-1.38)               |
| 2                         | 1.30 (1.02-1.66)             |                                | 1.27 (1.00-1.62)               | 1.16 (0.91-1.47)               | 1.17 (0.92-1.49)               |

|                               |                  |     |                  |                  |                  |
|-------------------------------|------------------|-----|------------------|------------------|------------------|
| 3                             | 1.27 (0.99-1.64) |     | 1.26 (0.98-1.62) | 1.15 (0.89-1.48) | 1.17 (0.91-1.50) |
| 4                             | 1.37 (1.06-1.76) |     | 1.34 (1.05-1.73) | 1.27 (0.98-1.64) | 1.29 (1.00-1.66) |
| 5                             | 1.00             |     | 1.00             | 1.00             | 1.00             |
| <b>Education</b>              |                  |     |                  |                  |                  |
| Secondary or less             | 1.01 (0.85-1.19) | N/A | 0.96 (0.81-1.13) | 0.88 (0.74-1.04) | 0.87 (0.75-1.05) |
| Some post-secondary           | 0.98 (0.68-1.39) |     | 0.94 (0.66-1.32) | 0.89 (0.63-1.25) | 0.89 (0.63-1.27) |
| Post-secondary degree/diploma | 1.00             |     | 1.00             | 1.00             | 1.00             |
| <b>Food security</b>          |                  |     |                  |                  |                  |
| Secure                        | 1.00             | N/A | 1.00             | 1.00             | 1.00             |
| Sometimes/often insecure      | 2.82 (2.06-3.86) |     | 2.62 (1.90-3.62) | 2.16 (1.55-3.01) | 2.07 (1.48-2.90) |
| <b>Alcohol Consumption</b>    |                  |     |                  |                  |                  |
| < weekly                      | 1.30 (1.01-1.66) | N/A | N/A              | 1.14 (0.88-1.49) | 1.13 (0.87-1.47) |
| 1-6 x weekly                  | 1.04 (0.81-1.33) |     |                  | 0.97 (0.76-1.25) | 0.97 (0.76-1.25) |

|                    |                  |     |     |                  |                  |
|--------------------|------------------|-----|-----|------------------|------------------|
| Everyday           | 1.00             |     |     | 1.00             | 1.00             |
| Not Answered       | 1.82 (1.44-2.28) |     |     | 1.63 (1.28-2.07) | 1.60 (1.26-2.03) |
| Chronic Opioid Use |                  |     |     |                  |                  |
| Non-user           | 1.00             | N/A | N/A | 1.00             | 1.00             |
| User               | 3.25 (2.62-4.04) |     |     | 2.76 (2.21-3.45) | 2.32 (1.84-2.92) |
| Smoking Status     |                  |     |     |                  |                  |
| Non-smoker         | 1.00             | N/A | N/A | 1.00             | 1.00             |
| Smoker             | 2.08 (1.66-2.61) |     |     | 1.84 (1.42-2.37) | 1.95 (1.50-2.52) |
| Morbidity (JH ADG) |                  |     |     |                  |                  |
| 0-4                | 1.00             | N/A | N/A | N/A              | 1.00             |
| 5-9                | 1.55 (1.23-1.96) |     |     |                  | 1.56 (1.23-1.99) |
| ≥10                | 2.48 (2.01-3.06) |     |     |                  | 2.46 (1.97-3.08) |

Unweighted n=31,717, sum of weights = 6,431,221

Abbreviations: OR=odds ratio, CI=confidence interval, JH ADG=John Hopkins Aggregated Diagnostic Group

Table 2b. Weighted Logistic Regression Results Quantifying Associations between Potential Risk Factors and Mood Disorder

Stratified by Sex

|  | <b>Male</b> | <b>Female</b> |
|--|-------------|---------------|
|--|-------------|---------------|



|                               |                  |                  |                  |                  |                  |                  |                  |                  |
|-------------------------------|------------------|------------------|------------------|------------------|------------------|------------------|------------------|------------------|
| <b>Education</b>              |                  |                  |                  |                  |                  |                  |                  |                  |
| Secondary or less             | 0.84 (0.64-1.11) | 0.84 (0.64-1.11) | 0.75 (0.56-1.00) | 0.75 (0.57-1.00) | 1.03 (0.84-1.26) | 1.04 (0.85-1.28) | 0.97 (0.79-1.19) | 0.98 (0.80-1.20) |
| Some post-secondary           | 0.86 (0.52-1.43) | 0.86 (0.52-1.42) | 0.77 (0.46-1.29) | 0.77 (0.46-1.28) | 1.03 (0.64-1.67) | 1.01 (0.63-1.60) | 0.98 (0.61-1.56) | 0.99 (0.61-1.59) |
| Post-secondary degree/diploma | 1.00             | 1.00             | 1.00             | 1.00             | 1.00             | 1.00             | 1.00             | 1.00             |
| <b>Food Security</b>          |                  |                  |                  |                  |                  |                  |                  |                  |
| Secure                        | 1.00             | 1.00             | 1.00             | 1.00             | 1.00             | 1.00             | 1.00             | 1.00             |
| Sometimes/often insecure      | 3.10 (1.94-4.94) | 3.15 (1.94-5.14) | 2.27 (1.31-3.93) | 2.19 (1.26-3.80) | 2.58 (1.74-3.83) | 2.41 (1.61-3.61) | 2.09 (1.40-3.12) | 2.00 (1.33-3.01) |
| <b>Alcohol Consumption</b>    |                  |                  |                  |                  |                  |                  |                  |                  |
| < weekly                      | 1.14 (0.73-1.77) | N/A              | 1.11 (0.72-1.73) | 1.10 (0.71-1.70) | 1.21 (0.90-1.64) | N/A              | 1.14 (0.83-1.56) | 1.14 (0.84-1.56) |
| 1-6 x weekly                  | 1.01 (0.69-1.47) |                  | 0.96 (0.66-1.41) | 0.95 (0.65-1.38) | 1.01 (0.75-1.37) |                  | 0.98 (0.72-1.32) | 0.99 (0.73-1.34) |
| Everyday                      | 1.00             |                  | 1.00             | 1.00             | 1.00             |                  | 1.00             | 1.00             |
| Not Answered                  | 1.78 (1.24-2.55) |                  | 1.74 (1.18-2.55) | 1.67 (1.13-2.48) | 1.60 (1.21-2.12) |                  | 1.55 (1.16-2.08) | 1.54 (1.15-2.07) |
| <b>Chronic Opioid Use</b>     |                  |                  |                  |                  |                  |                  |                  |                  |

|                       |                  |     |                  |                  |                  |     |                  |                  |
|-----------------------|------------------|-----|------------------|------------------|------------------|-----|------------------|------------------|
| Non-user              | 1.00             | N/A | 1.00             | 1.00             | 1.00             | N/A | 1.00             | 1.00             |
| User                  | 3.45 (2.39-4.97) |     | 3.05 (2.09-4.45) | 2.41 (1.64-3.56) | 3.02 (2.33-3.91) |     | 2.69 (2.07-3.49) | 2.32 (1.76-3.04) |
| <b>Smoking Status</b> |                  |     |                  |                  |                  |     |                  |                  |
| Non-smoker            | 1.00             | N/A | 1.00             | 1.00             | 1.00             | N/A | 1.00             | 1.00             |
| Smoker                | 2.61 (1.71-3.98) |     | 2.43 (1.49-3.97) | 2.62 (1.59-4.30) | 1.81 (1.46-2.26) |     | 1.54 (1.23-1.93) | 1.62 (1.29-2.03) |
| <b>JH ADG</b>         |                  |     |                  |                  |                  |     |                  |                  |
| 0-4                   | 1.00             | N/A | N/A              | 1.00             | 1.00             | N/A | N/A              | 1.00             |
| 5-9                   | 1.67 (1.07-2.60) |     |                  | 1.72 (1.09-2.71) | 1.48 (1.13-1.94) |     |                  | 1.48 (1.13-1.95) |
| ≥10                   | 2.83 (1.90-4.21) |     |                  | 2.96 (1.93-4.54) | 2.28 (1.77-2.94) |     |                  | 2.22 (1.70-2.91) |

Males: unweighted n=13,214, sum of weights = 2,886,467 Females: unweighted n =18,503 sum of weights = 3,543,711

Abbreviations: OR=odds ratio, CI=confidence interval, JH ADG= John's Hopkins Aggregated Diagnostic Group

Table 3a. Adjusted Weighted Associations Between Mood Disorder and Health Service Utilization Outcomes



| <b>Outcome</b>                                          | <b>Crude OR<br/>(95% CI)</b> | <b>Model 1 OR (95%<br/>CI)</b> | <b>Model 2 OR (95%<br/>CI)</b> | <b>Model 3 OR (95% CI)</b> | <b>Model 4 OR (95% CI)</b> |
|---------------------------------------------------------|------------------------------|--------------------------------|--------------------------------|----------------------------|----------------------------|
| General Emergency<br>Department Visits                  | 1.73 (1.42-2.12)             | 1.85 (1.51-2.28)               | 1.81 (1.47-2.22)               | 1.69 (1.37-2.09)           | 1.49 (1.20-1.85)           |
| Mental Health-Related<br>Emergency Department<br>Visits | 3.83 (2.86-5.12)             | 3.95 (2.95-5.29)               | 3.83 (2.87-5.12)               | 3.55 (2.62-4.82)           | 3.36 (2.47-4.56)           |
| General Hospitalizations                                | 1.65 (1.41-1.93)             | 1.93 (1.65-2.26)               | 1.88 (1.61-2.21)               | 1.69 (1.43-1.99)           | 1.55 (1.31-1.83)           |
| Mental Health-Related<br>Hospitalizations               | 3.27 (2.43-4.39)             | 3.61 (2.69-4.86)               | 3.55 (2.65-4.77)               | 3.18 (2.37-4.27)           | 3.01 (2.23-4.07)           |
| Admission to Long-term<br>Care                          | 2.22 (1.72-2.87)             | 2.75 (2.09-3.62)               | 2.66 (2.02-3.50)               | 2.36 (1.78-3.11)           | 2.28 (1.71-3.02)           |
| Death                                                   | 1.41 (1.18-1.67)             | 1.74 (1.46-2.07)               | 1.71 (1.44-2.04)               | 1.46 (1.21-1.74)           | 1.35 (1.13-1.63)           |

Unweighted n=32,300, sum of weights=6,558,881

Abbreviations: OR=odds ratio, CI=confidence interval

Table 3b. Adjusted Weighted Associations Between Mood Disorder and Health Service Utilization Outcomes Stratified by Sex

|                                                               | Male                 |                        |                        |                        |                        | Female               |                           |                        |                        |                        |
|---------------------------------------------------------------|----------------------|------------------------|------------------------|------------------------|------------------------|----------------------|---------------------------|------------------------|------------------------|------------------------|
| Outcome                                                       | Crude OR<br>(95% CI) | Model 1 OR<br>(95% CI) | Model 2 OR<br>(95% CI) | Model 3 OR<br>(95% CI) | Model 4 OR<br>(95% CI) | Crude OR<br>(95% CI) | Model 1<br>OR (95%<br>CI) | Model 2 OR<br>(95% CI) | Model 3 OR<br>(95% CI) | Model 4 OR<br>(95% CI) |
| General<br>Emergency<br>Department<br>Visits                  | 1.70 (1.12-2.60)     | 1.80 (1.17-2.76)       | 1.77 (1.16-<br>2.70)   | 1.64 (1.09-<br>2.49)   | 1.41 (0.93-<br>2.15)   | 1.76 (1.41-<br>2.19) | 1.88<br>(1.51-<br>2.35)   | 1.84 (1.47-2.31)       | 1.73 (1.38-2.18)       | 1.55 (1.23-<br>1.96)   |
| MentalHealth-<br>Related<br>Emergency<br>Department<br>Visits | 3.43 (1.96-5.99)     | 3.54 (2.03-6.17)       | 3.48 (1.96-<br>6.17)   | 3.11 (1.67-<br>5.82)   | 2.99 (1.59-<br>5.63)   | 3.86 (2.72-<br>5.47) | 4.16<br>(2.92-<br>5.93)   | 4.03 (2.86-5.68)       | 3.80 (2.68-5.39)       | 3.56 (2.50-<br>5.07)   |
| General<br>Hospitalizations                                   | 1.64 (1.25-2.14)     | 1.86 (1.41-2.46)       | 1.84 (1.39-<br>2.44)   | 1.63 (1.21-<br>2.18)   | 1.47 (1.10-<br>1.95)   | 1.68 (1.40-<br>2.02) | 1.97(1.64-<br>2.36)       | 1.92 (1.59-2.30)       | 1.73 (1.43-2.09)       | 1.73 (1.43-<br>2.09)   |
| MentalHealth-<br>Related<br>Hospitalizations                  | 2.65 (1.62-4.34)     | 2.86 (1.75-4.68)       | 2.91 (1.79-<br>4.72)   | 2.52 (1.53-<br>4.15)   | 2.38 (1.44-<br>3.95)   | 3.66 (2.53-<br>5.30) | 4.12<br>(2.85-<br>5.96)   | 3.97 (2.73-5.78)       | 3.60 (2.47-5.24)       | 3.40 (2.30-<br>5.02)   |

|                                |                  |                  |                      |                      |                      |                      |                         |                  |                  |                      |
|--------------------------------|------------------|------------------|----------------------|----------------------|----------------------|----------------------|-------------------------|------------------|------------------|----------------------|
| Admission to<br>Long-term Care | 2.25 (1.53-3.32) | 2.77 (1.83-4.18) | 2.72 (1.82-<br>4.09) | 2.41 (1.60-<br>3.64) | 2.25 (1.49-<br>3.39) | 2.10 (1.51-<br>2.90) | 2.75<br>(1.94-<br>3.91) | 2.62 (1.84-3.73) | 2.32 (1.62-3.33) | 2.27 (1.57-<br>3.28) |
| Death                          | 1.60 (1.23-2.08) | 1.93 (1.49-2.50) | 1.93 (1.49-<br>2.51) | 1.61 (1.24-<br>2.10) | 1.48 (1.14-<br>1.92) | 1.34 (1.06-<br>1.70) | 1.61<br>(1.28-<br>2.04) | 1.59 (1.25-2.01) | 1.37 (1.06-1.76) | 1.29 (1.00-<br>1.67) |

Males: unweighted n=13,465, sum of weights=2,951,097 Females: unweighted n=18,835 sum of weights=3,607,784

Abbreviations: OR=odds ratio, CI=confidence interval
